# Supplementary material for: Changes in Community Structure of Resting State Functional Connectivity in Unipolar Depression
Source: PubMed Central journal article supplement (PMC3423402; doi:10.1371/journal.pone.0041282), 2012-08-20
Supplement: pone.0041282.s001.pdf [file pone.0041282.s001.pdf]

# Changes in community structure of resting state brain networks in unipolar depression

## Supplementary equations

Anton Lord<sup>1,2,\*</sup>, Dorothea Horn<sup>3,4</sup>, Michael Breakspear<sup>1,5,6,7</sup>, Martin Walter<sup>3,4,8</sup>

[1]Division of Mental Health Research, Queensland Institute of Medical Research, Brisbane, QLD, Australia

[2]University of Queensland, St Lucia, QLD, 4001, Australia

[3]Clinical Affective Neuroimaging Laboratory, Leibnitz Institute for Neurobiology, Brennekestrasse 6, 39120 Magdeburg

[4]Departments of Psychiatry and Neurology, Otto v. Guericke University, Leipziger Strasse 44, 39120 Magdeburg

[5]School of Psychiatry, University of New South Wales

[6]The Black Dog Institute, Sydney, NSW, Australia

[7]The Royal Brisbane and Womans Hospital, Brisbane, QLD, Australia

[8]Center for Behavioral and Brain Sciences (CBBS), Magdeburg, Germany

\* E-mail: antonL@qimr.edu.au

## Appendices

### A Distance dependant penalty

$$w_{adj} = w \frac{-\log(x) + k}{k} - r$$

### B Graph metric definitions

#### Participation index

$$y_i = 1 - \sum_{m \in M} \left( \frac{k_i(m)}{k_i} \right)^2 \quad (1)$$

where M is the set of modules obtained by the [1] method,  $k_i$  is the number of edges connected to node  $i$  and  $k_i(m)$  is the number of links originating at node  $i$  which finish within module  $m$ .

#### Characteristic path length

Characteristic path length of the network [2].

$$L^w = \frac{1}{n} \sum_{i \in N} \frac{\sum_{j \in N, j \neq i} d_{ij}^w}{n-1} \quad (2)$$

#### Local efficiency

Local efficiency of the network [3].

$$E_{loc}^w = \frac{1}{2} \sum_{i \in N} \frac{\sum_{j, h \in N, j \neq i} \left( w_{ij} w_{ih} \left[ d_{jh}^w(N_i) \right]^{-1} \right)^{\frac{1}{3}}}{k_i (k_i - 1)} \quad (3)$$

### Global efficiency

Global efficiency of the network [3].

$$E = \frac{1}{n} \sum_{i \in N} \frac{\sum_{j \in N, j \neq i} (d_{ij}^w)^{-1}}{n-1} \quad (4)$$

### Clustering coefficient

Clustering coefficient of the network [2].

$$C = \frac{1}{n} \sum_{i \in N} \frac{2t_i^w}{k_i(k_i-1)} \quad (5)$$

### Betweenness centrality

Betweenness centrality of node  $i$  [4].

$$b_i = \frac{1}{(n-1)(n-2)} \sum_{h, j \in N, h \neq j, h \neq i, j \neq i} \frac{p_{hj}(i)}{p_{hj}} \quad (6)$$

### Small worldness

Small world index [5]

$$S = \frac{C/C_{rand}}{L/L_{rand}} \quad (7)$$

## C Groupwise modular structure

Table 1: Modular structure identified at a groupwise level

| Region              | Module             |
|---------------------|--------------------|
| Amygdala_R          | Inferior occipital |
| Calcarine_L         | Inferior occipital |
| Calcarine_R         | Inferior occipital |
| Cuneus_L            | Inferior occipital |
| Cuneus_R            | Inferior occipital |
| Hippocampus_L       | Temporal           |
| Hippocampus_R       | Temporal           |
| ParaHippocampal_L   | Temporal           |
| ParaHippocampal_R   | Temporal           |
| Occipital_Inf_R     | Temporal           |
| Fusiform_L          | Temporal           |
| Fusiform_R          | Temporal           |
| Temporal_Mid_R      | Temporal           |
| Temporal_Pole_Mid_L | Temporal           |
| Frontal_Sup_L       | Frontal/Occipital  |
| Frontal_Sup_R       | Frontal/Occipital  |

*Continued on next page*

Table 1 – *Continued from previous page*

| Region                  | Module            |
|-------------------------|-------------------|
| Frontal_Sup_Orb_L       | Frontal/Occipital |
| Frontal_Sup_Orb_R       | Frontal/Occipital |
| Frontal_Mid_L           | Frontal/Occipital |
| Frontal_Mid_R           | Frontal/Occipital |
| Frontal_Mid_Orb_L       | Frontal/Occipital |
| Frontal_Mid_Orb_R       | Frontal/Occipital |
| Frontal_Inf_Orb_L       | Frontal/Occipital |
| Frontal_Inf_Orb_R       | Frontal/Occipital |
| Olfactory_L             | Frontal/Occipital |
| Olfactory_R             | Frontal/Occipital |
| Rectus_L                | Frontal/Occipital |
| Rectus_R                | Frontal/Occipital |
| Lingual_L               | Frontal/Occipital |
| Lingual_R               | Frontal/Occipital |
| Occipital_Sup_L         | Frontal/Occipital |
| Occipital_Sup_R         | Frontal/Occipital |
| Occipital_Mid_L         | Frontal/Occipital |
| Occipital_Mid_R         | Frontal/Occipital |
| Occipital_Inf_L         | Frontal/Occipital |
| Caudate_L               | Frontal/Occipital |
| Caudate_R               | Frontal/Occipital |
| Temporal_Pole_Sup_L     | Frontal/Occipital |
| Temporal_Pole_Sup_R     | Frontal/Occipital |
| Temporal_Mid_L          | Frontal/Occipital |
| Temporal_Pole_Mid_R     | Frontal/Occipital |
| Temporal_Inf_L          | Frontal/Occipital |
| Temporal_Inf_R          | Frontal/Occipital |
| Medial_Prefront_lower_L | Frontal/Occipital |
| Medial_Prefront_upper_L | Frontal/Occipital |
| Medial_Prefront_upper_R | Frontal/Occipital |
| Rostral_ACC_bilateral   | Frontal/Occipital |
| Pregenual_ACC_bilateral | Frontal/Occipital |
| Dorsal_ACC_bilateral    | Frontal/Occipital |
| Precentral_L            | Parietal premotor |
| Precentral_R            | Parietal premotor |
| Frontal_Inf_Oper_L      | Parietal premotor |
| Frontal_Inf_Oper_R      | Parietal premotor |
| Frontal_Inf_Tri_L       | Parietal premotor |
| Frontal_Inf_Tri_R       | Parietal premotor |
| Rolandic_Oper_L         | Parietal premotor |
| Rolandic_Oper_R         | Parietal premotor |
| Supp_Motor_Area_L       | Parietal premotor |
| Supp_Motor_Area_R       | Parietal premotor |
| Amygdala_L              | Parietal premotor |
| Postcentral_L           | Parietal premotor |
| Postcentral_R           | Parietal premotor |
| Parietal_Sup_L          | Parietal premotor |

*Continued on next page*

Table 1 – *Continued from previous page*

| Region                  | Module            |
|-------------------------|-------------------|
| Parietal_Sup_R          | Parietal premotor |
| Parietal_Inf_L          | Parietal premotor |
| Parietal_Inf_R          | Parietal premotor |
| SupraMarginal_L         | Parietal premotor |
| SupraMarginal_R         | Parietal premotor |
| Precuneus_L             | Parietal premotor |
| Paracentral_Lobule_L    | Parietal premotor |
| Paracentral_Lobule_R    | Parietal premotor |
| Putamen_L               | Parietal premotor |
| Putamen_R               | Parietal premotor |
| Pallidum_L              | Parietal premotor |
| Pallidum_R              | Parietal premotor |
| Heschl_L                | Parietal premotor |
| Heschl_R                | Parietal premotor |
| Temporal_Sup_L          | Parietal premotor |
| Temporal_Sup_R          | Parietal premotor |
| Ant_Insula_L            | Parietal premotor |
| Ant_Insula_R            | Parietal premotor |
| Post_Insula_L           | Parietal premotor |
| Post_Insula_R           | Parietal premotor |
| Posterior_MCC_bilateral | Parietal premotor |
| 23d_bilateral           | Parietal premotor |
| Frontal_Mid_Orb_L       | Prefrontal        |
| Frontal_Mid_Orb_R       | Prefrontal        |
| Angular_L               | Prefrontal        |
| Angular_R               | Prefrontal        |
| Precuneus_R             | Prefrontal        |
| Thalamus_L              | Prefrontal        |
| Thalamus_R              | Prefrontal        |
| Medial_Prefront_lower_R | Prefrontal        |
| dPCC_bilateral          | Prefrontal        |
| vPCC_bilateral          | Prefrontal        |

## D Group modularity identification

Simultaneous identification of the optimal modular decompositions is a two phase process. First the landscape for each individual is restricted to only decompositions that maximally overlap the typical decomposition of at least one other member of the group. The typical landscape for an individual is defined by the mode of the landscape for that subject.

The first pass landscape filter can be described as:

```

 $l \leftarrow \emptyset$ 
for  $i = 1 : n$  do
   $max_j \leftarrow 0$ 
  for  $j = 1 : m$  do
    if  $q > max_j$  then

```

```

     $max_j \leftarrow q$ 
  end if
end for
if  $max_j \notin l$  then
  append  $max_j$  to  $l$ 
end if
end for

```

where  $l$  is a list of all surviving decompositions for the subject,  $q$  is the goodness of fit between two decompositions,  $n$  is the number of decompositions in the landscape and  $m$  is the number of subjects in the group.

The second pass recursively finds the best matching pairs of modular decompositions, removes all other possibilities for those subjects and creates a typical decomposition for the combined subjects for which everything is compared to in future comparisons.

## References

1. Rubinov M, Sporns O (2011) Weight-conserving characterization of complex functional brain networks. *NeuroImage In Press, Corrected Proof*: –.
2. Watts DJ, Strogatz SH (1998) Collective dynamics of /‘small-world/’ networks. *Nature* 393: 440–442.
3. Latora V, Marchiori M (2001) Efficient behavior of small-world networks. *Phys Rev Lett* 87: 198701–.
4. Freeman LC (1978) Centrality in social networks conceptual clarification. *Social Networks* 1: 215–239.
5. Humphries MD, Gurney K (2008) Network ‘small-world-ness’: a quantitative method for determining canonical network equivalence. *PLoS ONE* 3: e0002051–e0002051.
